# Supplementary material for: Controlled electropositive catalytic sites on zeolites for achieving high CH3Cl selectivity via electrophilic CH4 chlorination using Cl2
Source: Royal Society of Chemistry journal article supplement (doi:10.1039/d2ta06787k), 2022-01-01
Supplement: d2ta06787k1.pdf [file d2ta06787k1.pdf]

Supporting Information for  
Controlled Electropositive Catalytic Sites on Zeolites for Achieving High  
CH<sub>3</sub>Cl Selectivity via Electrophilic CH<sub>4</sub> Chlorination using Cl<sub>2</sub>

Yuyeol Choi<sup>a,‡</sup>, Sunghyun Park<sup>a,‡</sup>, Seungdon Kwon<sup>a</sup>, Kyoung Chul Ko<sup>b,\*</sup>, and Kyungsu Na<sup>a,\*</sup>

<sup>a</sup>Department of Chemistry, Chonnam National University, Gwangju 61186, Republic of Korea

<sup>b</sup>Department of Chemistry Education, Chonnam National University, Gwangju 61186, Republic of  
Korea

<sup>‡</sup>These authors contributed equally.

\*Corresponding author. Tel: +82-62-530-3494, E-mail: kyungsu\_na@chonnam.ac.kr

Tel: +82-62-530-2491, E-mail: kcko1982@chonnam.ac.kr

**Table S1.** Standard Gibbs energies ( $\Delta G_f^\circ$ ) of possible chlorination reactions depending on the Cl source

| Reactant        | Reaction                                   | $\Delta G_f^\circ$ (kJ mol <sup>-1</sup> ) | Reference |
|-----------------|--------------------------------------------|--------------------------------------------|-----------|
| Cl <sub>2</sub> | $CH_4 + Cl_2 \rightarrow CH_3Cl + HCl$     | -115.7                                     | [1]       |
|                 | $CH_3Cl + Cl_2 \rightarrow CH_2Cl_2 + HCl$ | -105                                       |           |
|                 | $CH_2Cl_2 + Cl_2 \rightarrow CHCl_3 + HCl$ | -87.8                                      |           |
|                 | $CHCl_3 + Cl_2 \rightarrow CCl_4 + HCl$    | -62.5                                      |           |
| HCl             | $CH_4 + HCl \rightarrow CH_3Cl + H_2$      | 83.5                                       |           |
|                 | $CH_3Cl + HCl \rightarrow CH_2Cl_2 + H_2$  | 94.2                                       |           |
|                 | $CH_2Cl_2 + HCl \rightarrow CHCl_3 + H_2$  | 111.4                                      |           |
|                 | $CHCl_3 + HCl \rightarrow CCl_4 + H_2$     | 136.7                                      |           |

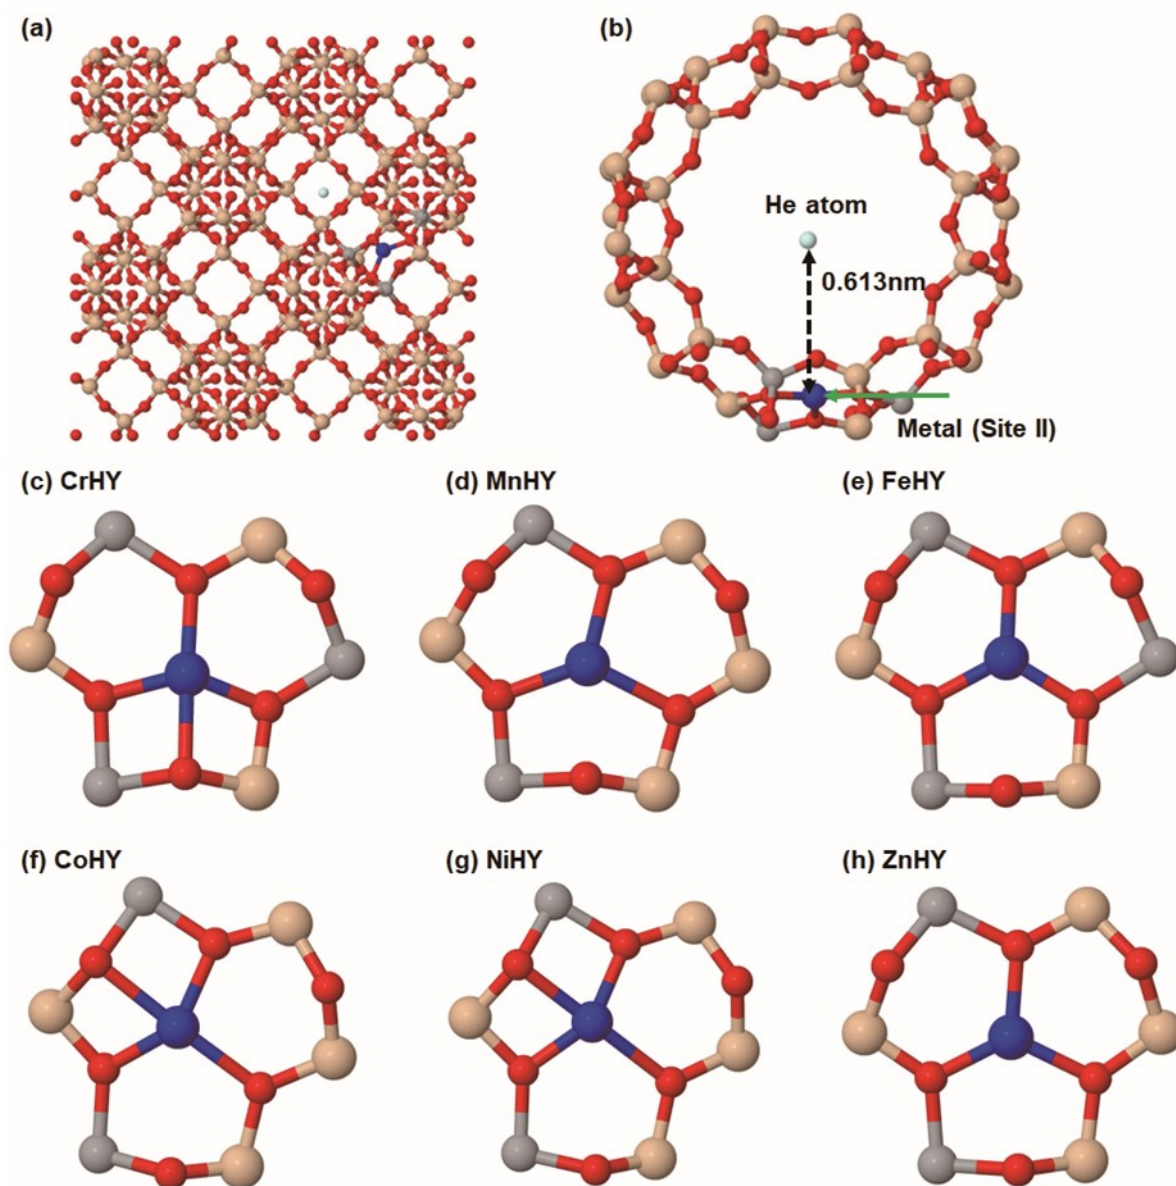

**Fig. S1.** Y zeolite models for p-DOS calculations. (a) Unit cell of the Y zeolite structure (b) He atom located in the middle of the Y zeolite pore to avoid additional interactions (c–h) Y zeolite pore interacting with metal cations bound to Site II (He, white; O, red; Si, ivory; Al, gray; transition metal atoms, blue).

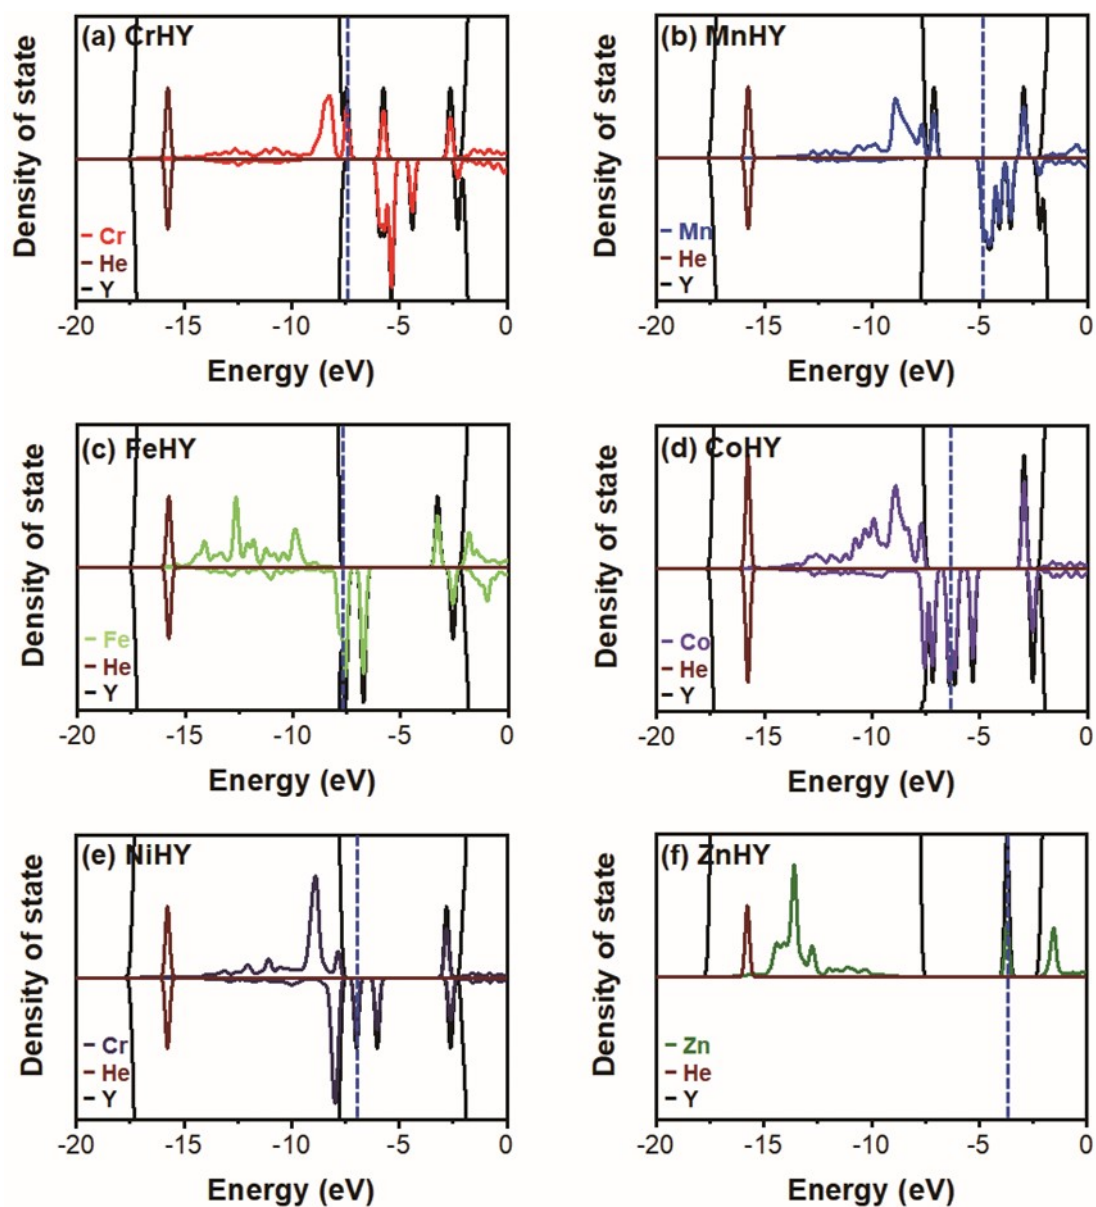

**Fig. S2.** Calculated atom-projected partial density of states for (a) CrHY, (b) MnHY, (c) FeHY, (d) CoHY, (e) NiHY, and (f) ZnHY. For comparison, the He 1s orbital energy level is set as a reference at -15.77 eV. The blue dashed line indicates the LUMO energy level of each Y zeolite model.

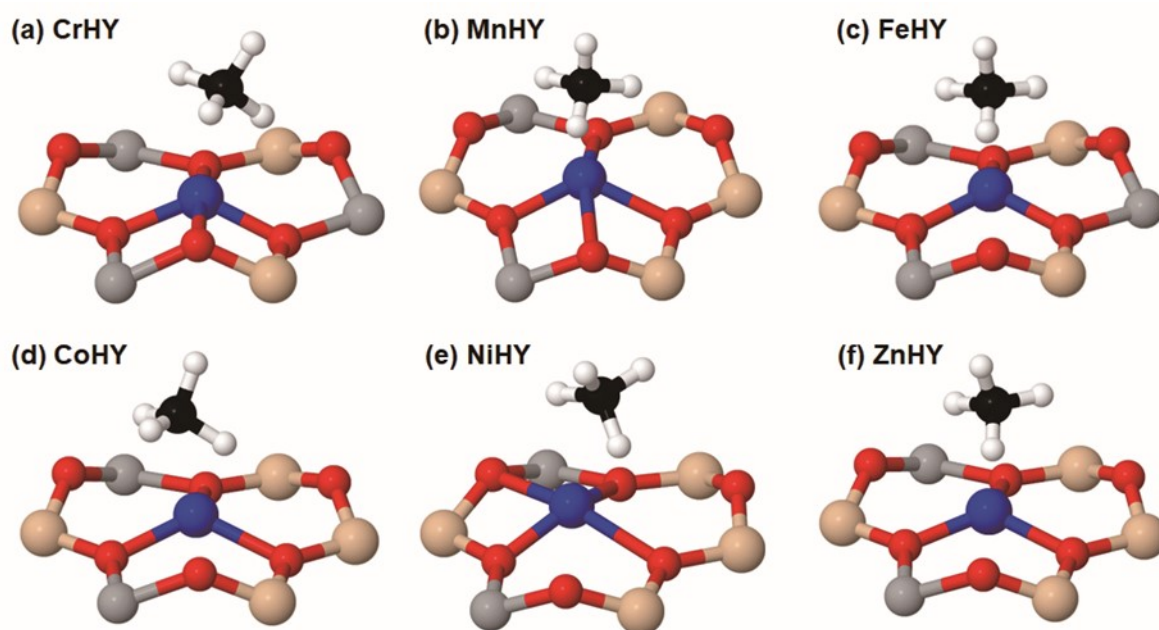

**Fig. S3.** CH<sub>4</sub> adsorption models in (a) CrHY, (b) MnHY, (c) FeHY, (d) CoHY, (e) NiHY, and (f) ZnHY used to calculate the theoretical CH<sub>4</sub> adsorption energy (H, white; C, black; O, red; Si, ivory; Al, gray; and transition metal atoms, blue).

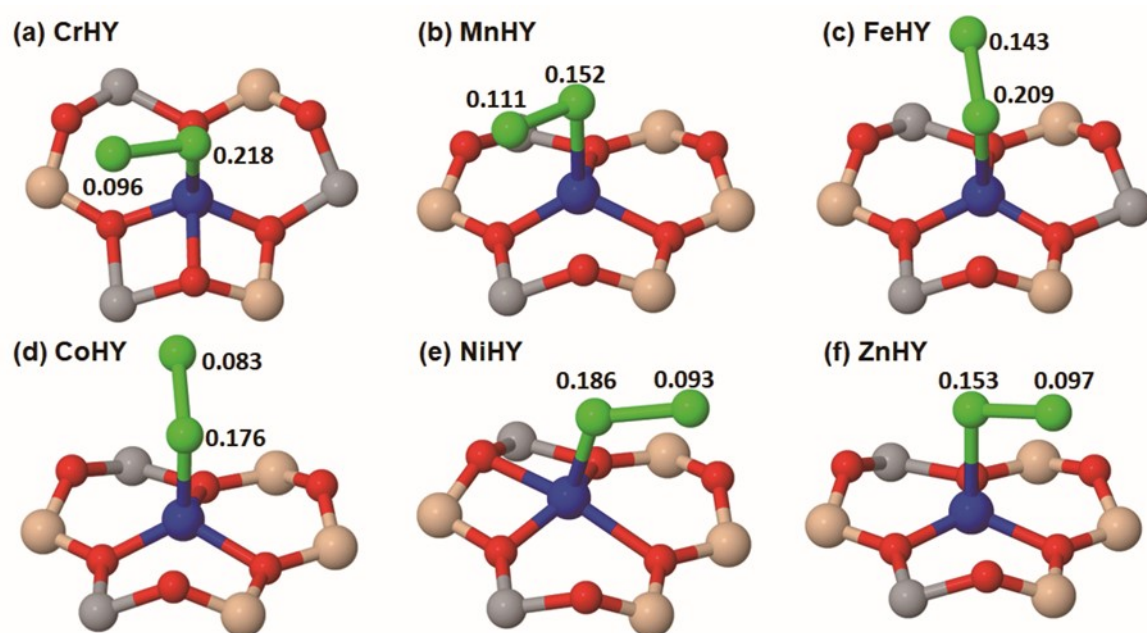

**Fig. S4.** Cl<sub>2</sub> adsorption models in (a) CrHY, (b) MnHY, (c) FeHY, (d) CoHY, (e) NiHY, and (f) ZnHY used to calculate the theoretical Cl<sub>2</sub> adsorption energy (Cl, green; O, red; Si, ivory; Al, gray; and transition metal atoms, blue). The numbers in the vicinity of Cl atoms indicate the charge values affected by Cl<sub>2</sub> polarization on electropositive transition metal cations.

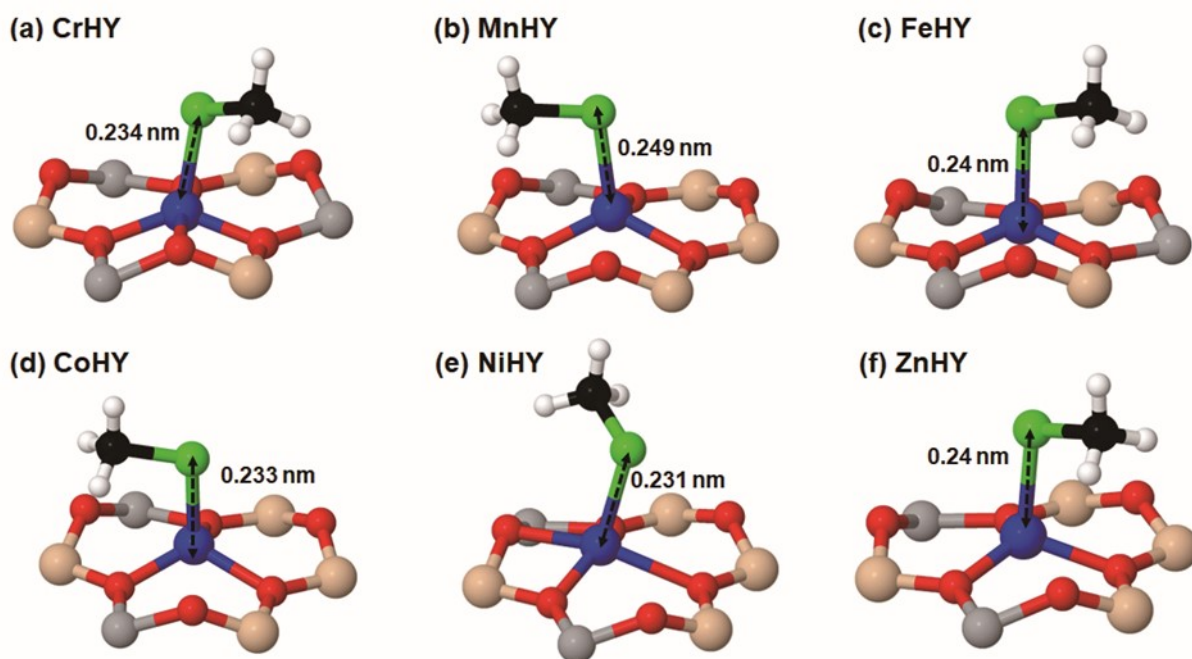

**Fig. S5.** CH<sub>3</sub>Cl adsorption models in (a) CrHY, (b) MnHY, (c) FeHY, (d) CoHY, (e) NiHY, and (f) ZnHY used to calculate the theoretical CH<sub>3</sub>Cl adsorption energy (H, white; C, black; Cl, green; O, red; Si, ivory; Al, gray; and transition metal atoms, blue).

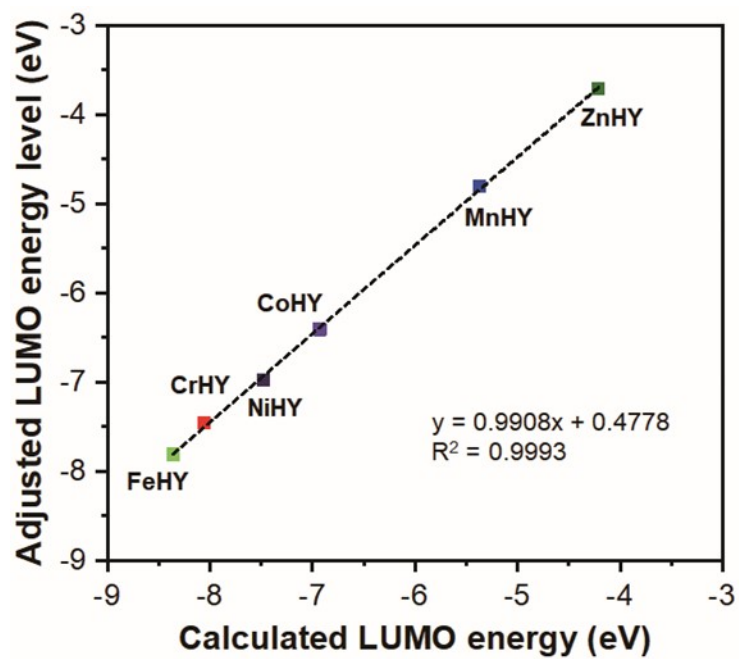

**Fig. S6.** Correlation between calculated LUMO and adjusted LUMO energy levels using an He atom



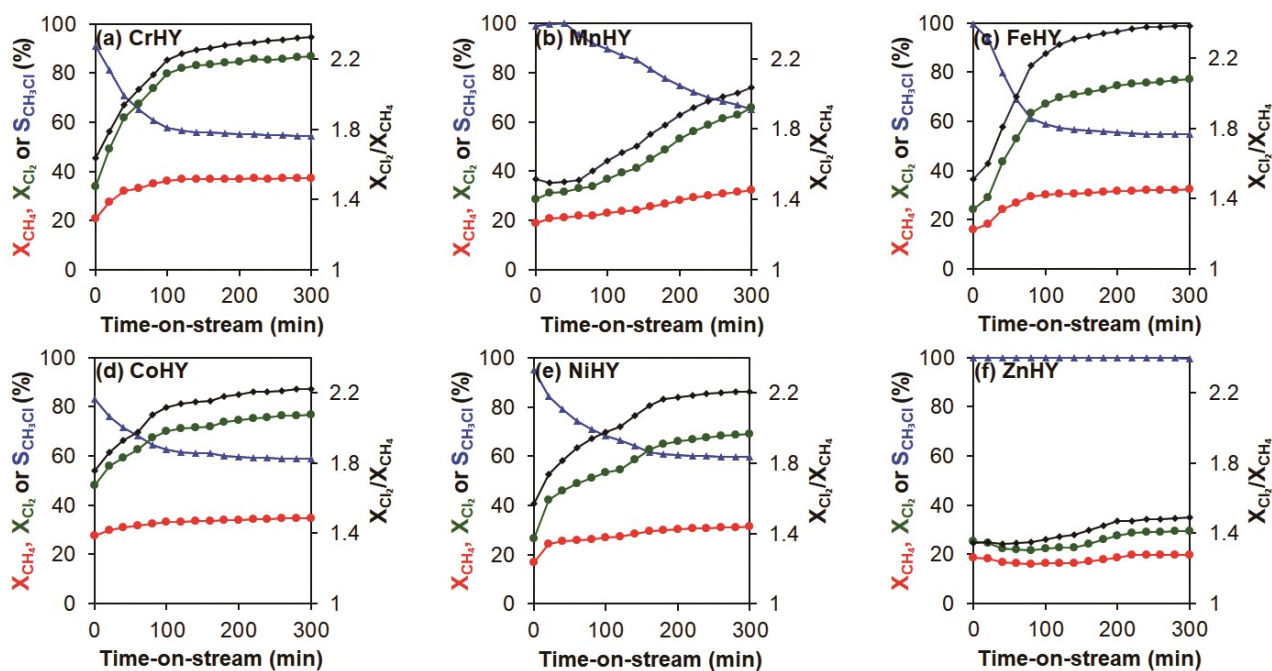

**Fig. S7.** Reaction profiles showing  $CH_4$  conversion ( $X_{CH_4}$ , red circles),  $Cl_2$  conversion ( $X_{Cl_2}$ , green circles),  $CH_3Cl$  selectivity ( $S_{CH_3Cl}$ , blue triangles), and conversion ratio of  $Cl_2/CH_4$  ( $X_{Cl_2}/X_{CH_4}$ , black rhombus) as a function of time-on-stream (min).

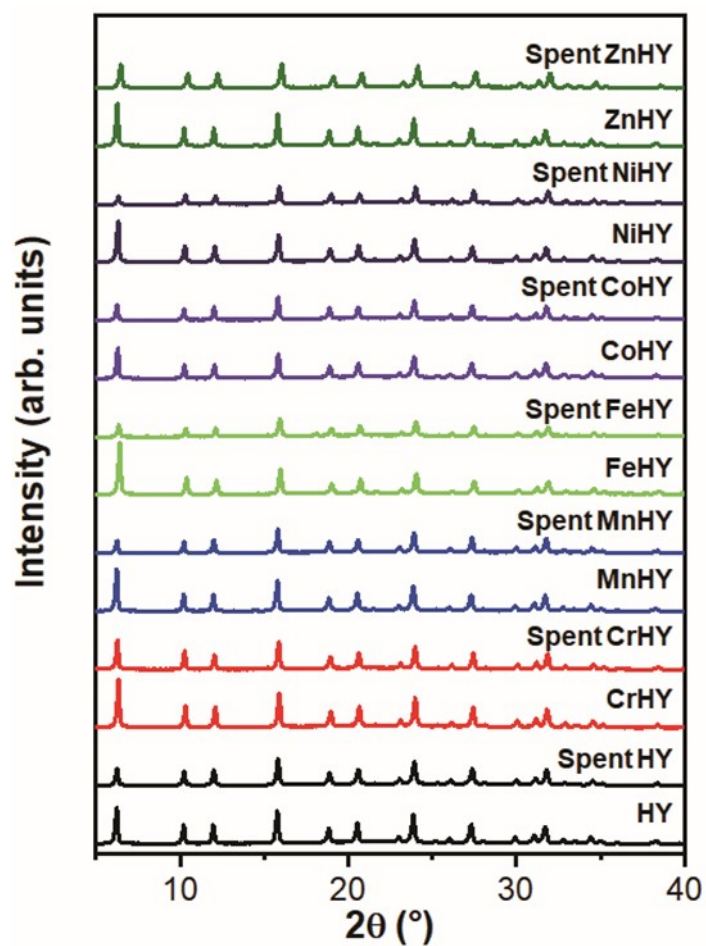

**Fig. S8.** XRD diffraction patterns of HY zeolites partially exchanged with  $\text{Zn}^{2+}$ ,  $\text{Ni}^{2+}$ ,  $\text{Co}^{2+}$ ,  $\text{Fe}^{3+}$ ,  $\text{Mn}^{2+}$ , and  $\text{Cr}^{3+}$  ions before and after the reaction, in comparison with those of pristine HY.

## References

- [1] D. W. Oxtoby, H. P. Gillis, A. Campion, Principle of Modern Chemistry, 7th ed., Cengage learning, 2014.
